# Supplementary material for: Analysis of the circRNA and T-UCR populations identifies convergent pathways in mouse and human models of Rett syndrome
Source: PubMed Central journal article supplement — Mol Ther Nucleic Acids. 2021 Dec 22;27:621–44. doi: 10.1016/j.omtn.2021.12.030 (PMC8749388; doi:10.1016/j.omtn.2021.12.030), 2021-12-22
Supplement: mmc1.pdf [file mmc1.pdf]

## **Supplemental information**

### **Analysis of the circRNA and T-UCR populations**

**identifies convergent pathways in mouse**

**and human models of Rett syndrome**

**Edilene Siqueira, Aida Obiols-Guardia, Olga C. Jorge-Torres, Cristina Oliveira-Mateos, Marta Soler, Deepthi Ramesh-Kumar, Fernando Setién, Daniëlle van Rossum, Ainhoa Pascual-Alonso, Clara Xiol, Cristina Ivan, Masayoshi Shimizu, Judith Armstrong, George A. Calin, R. Jeroen Pasterkamp, Manel Esteller, and Sonia Guil**

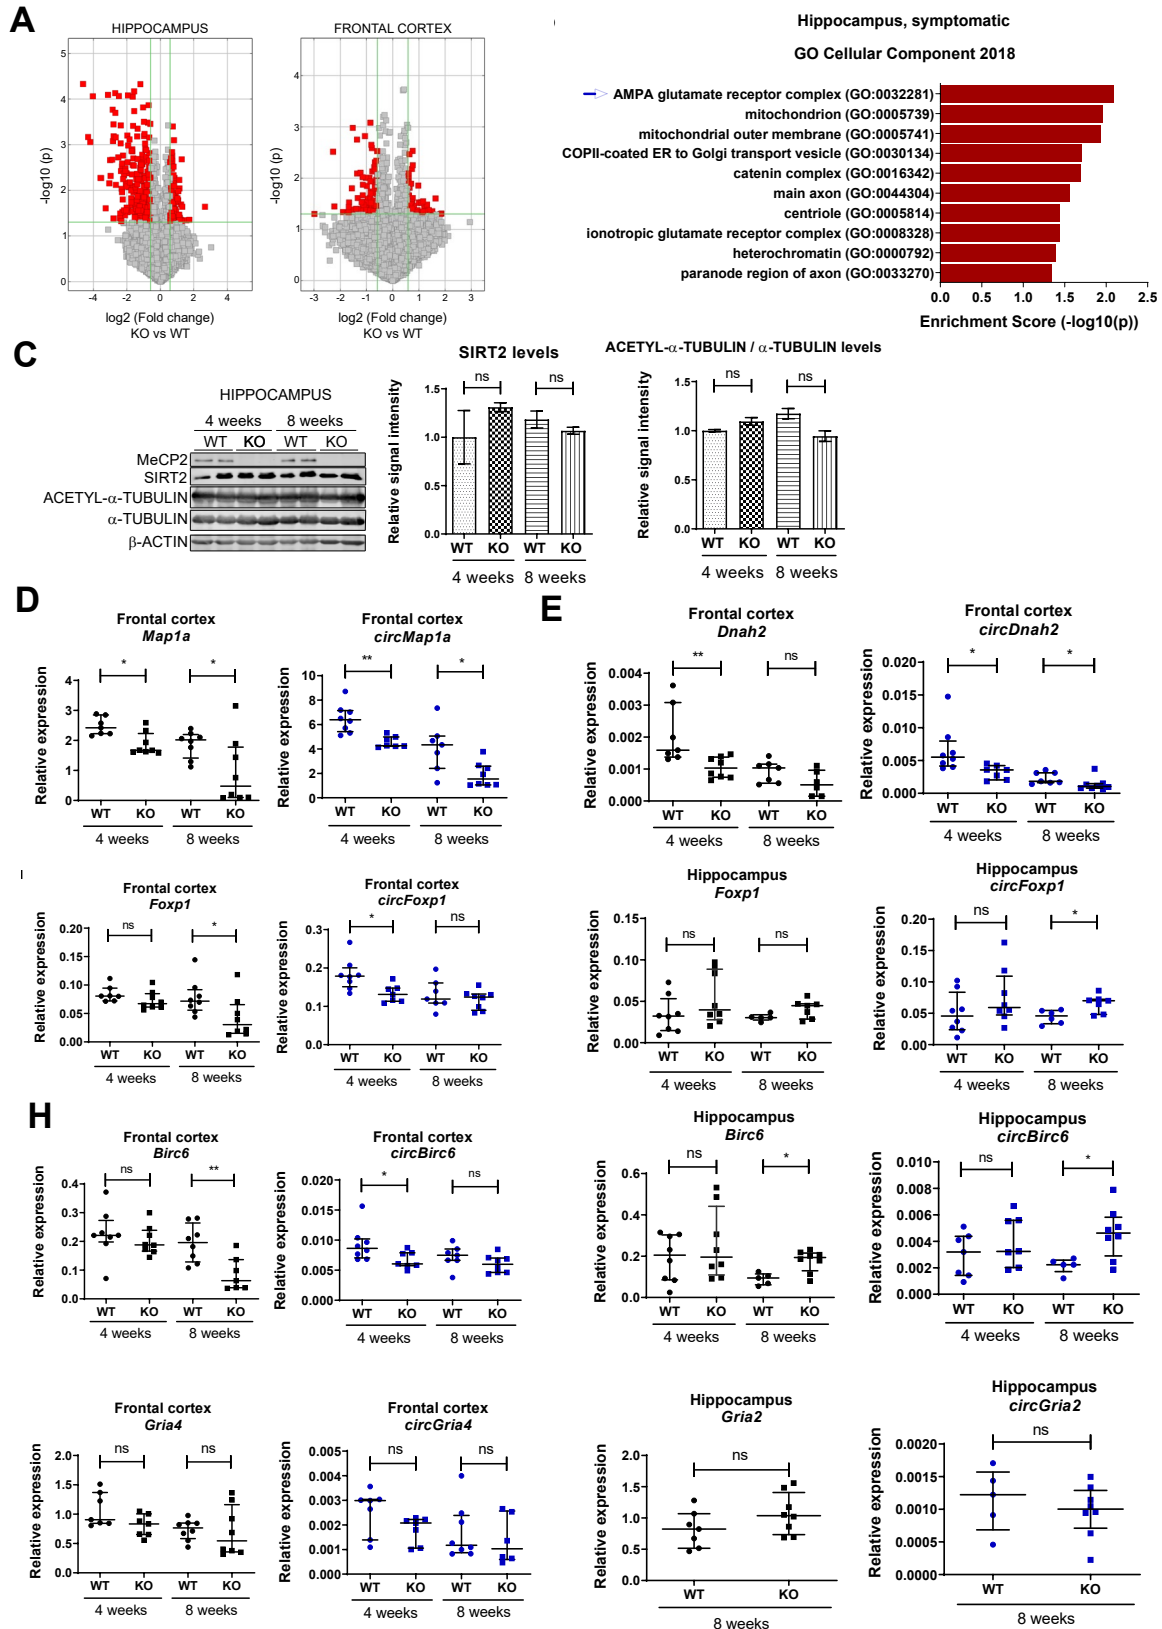

**Figure S1. Related to Figure 1. Characterization of circular RNA species in *Mecp2*-KO mice.** (A) Volcano plots for visualizing differential expression between WT and *Mecp2*-KO samples in hippocampus and frontal cortex of symptomatic mice. The vertical lines correspond to 1.5-fold greater and lesser values, and the horizontal line represents  $p < 0.05$  (two-tailed unpaired t test).

Each red point on the plot represents significantly differentially expressed circRNAs. (B) Enriched Gene Ontology terms (Cellular Component 2018) for the host genes of altered circRNA (> 2-FC), as identified by functional clustering (Enrichr). (C) Western blot analysis of MeCP2, SIRT2, acetyl- $\alpha$ -TUBULIN and  $\alpha$ -TUBULIN in the hippocampus from WT and KO pre-symptomatic and symptomatic mice. Samples from two animals per condition are shown. Graphs on the right represent quantitation of band intensity (two-tailed unpaired t test, ns = not significant). (D)-(K) Expression levels of host linear and circular species were analyzed by RT-qPCR in the indicated brain regions of WT and *Mecp2*-KO pre-symptomatic (4-week-old) and symptomatic (8-week-old) mice. Graphs represent the median and interquartile range of 6-8 replicates from different animals per condition (two-tailed Mann-Whitney U test, \*\* p < 0.01, \* p < 0.05, ns = not significant).

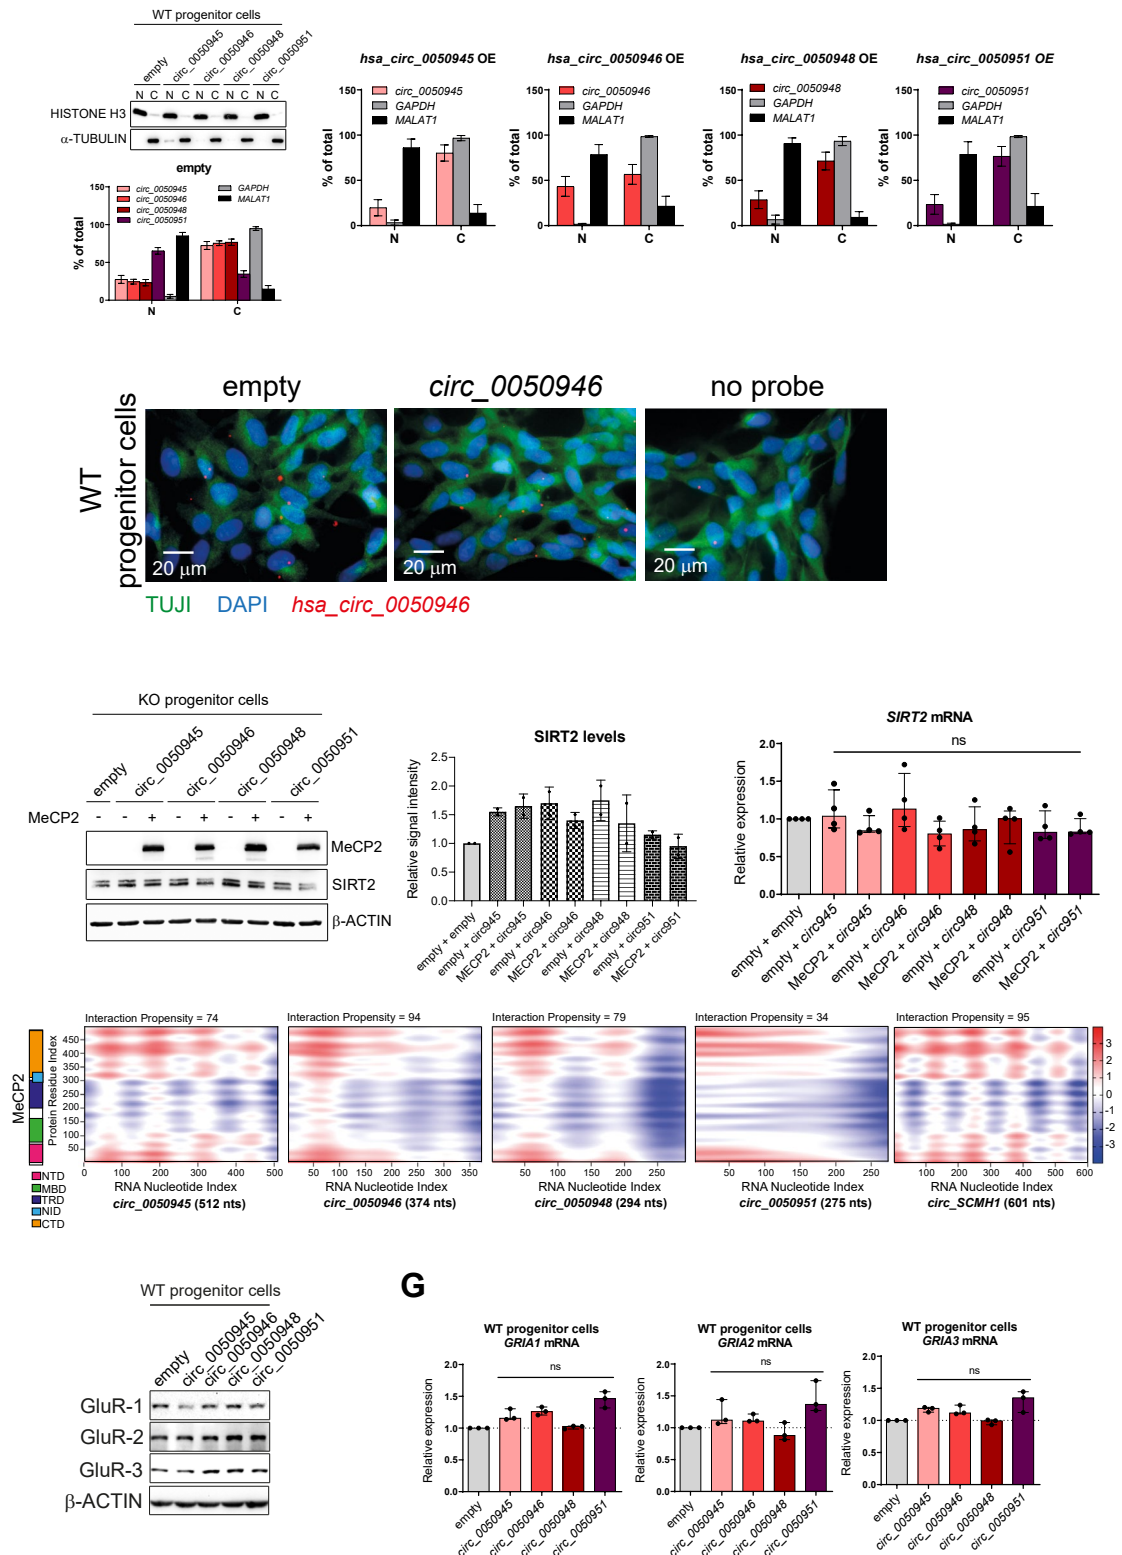

**Figure S2. Related to Figure 2. Characterization of circRNAs derived from human *SIRT2* locus.** (A) Nuclear/cytoplasmic fractionation of WT neural progenitor cells (control or overexpressing (OE) specific circRNAs, as indicated), analyzed by RT-qPCR and western blot to assess fraction purity. *GAPDH* and *MALAT1* are used as references of cytoplasmic and nuclear RNAs, respectively. (B) RNA ISH showing localization of overexpressed human *hsa\_circ\_0050946* in WT neural progenitor cells. Colocalization with the neuronal marker TUJ1 is shown. (C) Western blot analysis of MeCP2 and SIRT2 in *MeCP2*-KO progenitor cells upon

overexpression of the different *circSIRT2* and/or MeCP2, as indicated. The graph on the right represents quantitation of band intensity of two representative experiments. **(D)** Expression levels of *SIRT2* mRNA was analyzed by RT-qPCR in the same samples as in (C). The graph shows the median and interquartile range (one-way ANOVA, ns = not significant). **(E)** Prediction of *circSIRT2s*-MeCP2 interactions by using the catRAPID algorithm. Prediction for *circSCMH1* is also shown for comparison. **(F)**. Western blot analysis of GluR receptor subunits in WT progenitor cells upon overexpression of the indicated *circSIRT2s*. **(G)** Expression levels of *GRIA1/2/3* mRNA was analyzed by RT-qPCR in the same samples as in (E). The graph shows the median and interquartile range (one-way ANOVA, ns = not significant).

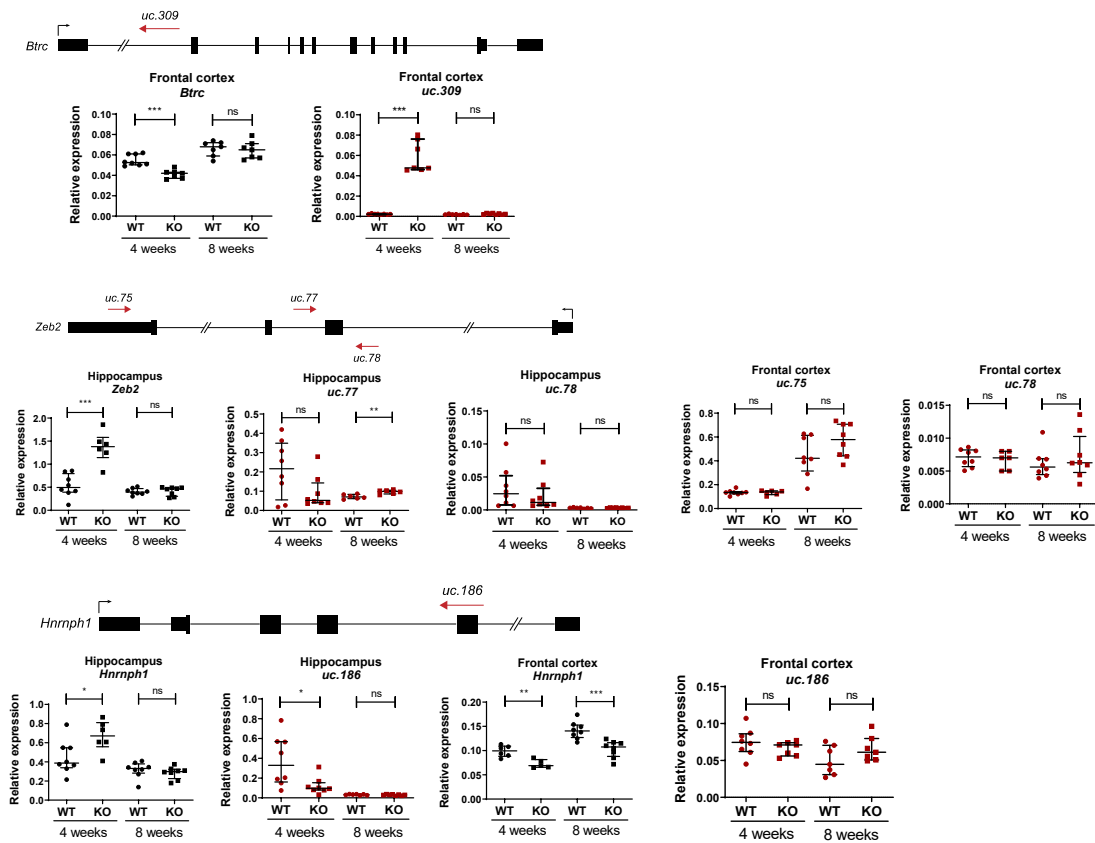

**Figure S3. Related to Figure 4. Validation of T-UCR expression in *Mecp2*-KO mice.** (A)-(C) RT-qPCR analysis and validation of candidate altered T-UCRs and their corresponding host genes in the indicated brain regions from WT and KO pre-symptomatic (4-week-old) and symptomatic mice (8-week-old). Diagrams represent genomic organization of each locus, and location and sense of T-UCR transcription are indicated by the red arrows. Graphs represent the median with interquartile range of 6-8 replicates from different animals per condition (two-tailed Mann-Whitney U test, \*  $p < 0.05$ , \*\*  $p < 0.01$ , \*\*\*  $p < 0.001$ , ns = not significant).

**A**

| Sample ID | Mutation                            | Age (y) |
|-----------|-------------------------------------|---------|
| RTT-1     | NM_004992.3:deletion on exon 4      | 28      |
| RTT-2     | c.806delG rs61750241                | 20      |
| RTT-3     | NM_004992.3: c.965C>T (p.Pro322Leu) | 6       |
| RTT-4     | c.316C>T rs28934907                 | 8       |
| CTRL-1    | no mutation on <i>MECP2</i>         | 29      |
| CTRL-2    | no mutation on <i>MECP2</i>         | 24      |
| CTRL-3    | no mutation on <i>MECP2</i>         | 10      |
| CTRL-4    | no mutation on <i>MECP2</i>         | 7       |

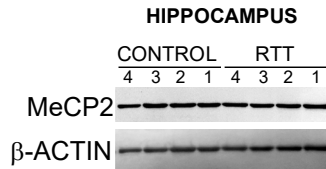**B**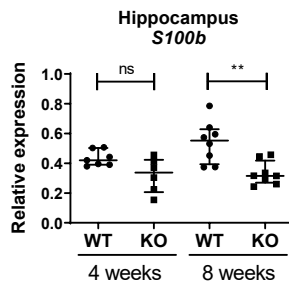**C**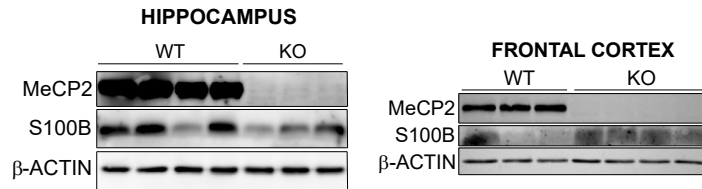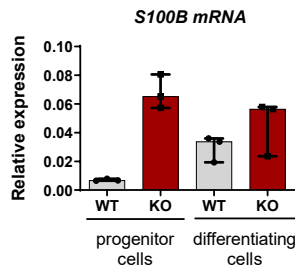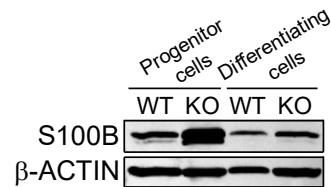

**Figure S4. Related to Figure 4. S100B levels in different models of RTT.** (A) *Upper list*, Genotype of post-mortem samples used in this study (4 control and 4 RTT patients). The mutation type found on MeCP2 for each RTT patient, as well as the age, is indicated. Below, western blot analysis of MeCP2 levels in the same samples. (B) Total RNA from the hippocampus of WT and *Mecp2*-KO pre-symptomatic (4-week-old) and symptomatic mice (8-week-old) was analyzed by RT-qPCR to assess *S100b* transcript levels. Graphs represent the median and interquartile range of 6-8 independent animals. Two-tailed Mann-Whitney U test were used (\*\*  $p < 0.01$ , ns = not significant). (C) Western blot analysis of MeCP2 and S100B in the hippocampus from WT and *Mecp2*-KO symptomatic mice. Samples from 3-4 animals per condition are shown. (D) Western blot analysis of MeCP2 and S100B in the frontal cortex from WT and *Mecp2*-KO symptomatic mice. Samples from 3-4 animals per condition are shown. (E) S100B levels in WT or *MeCP2*-KO neural progenitor or differentiating cells (30 days) were analyzed by RT-qPCR. Graphs represent the median and interquartile range of three independent replicates. (F) Western blot analysis of S100B in WT and *MeCP2*-KO neural progenitor or differentiating cells (30 days).

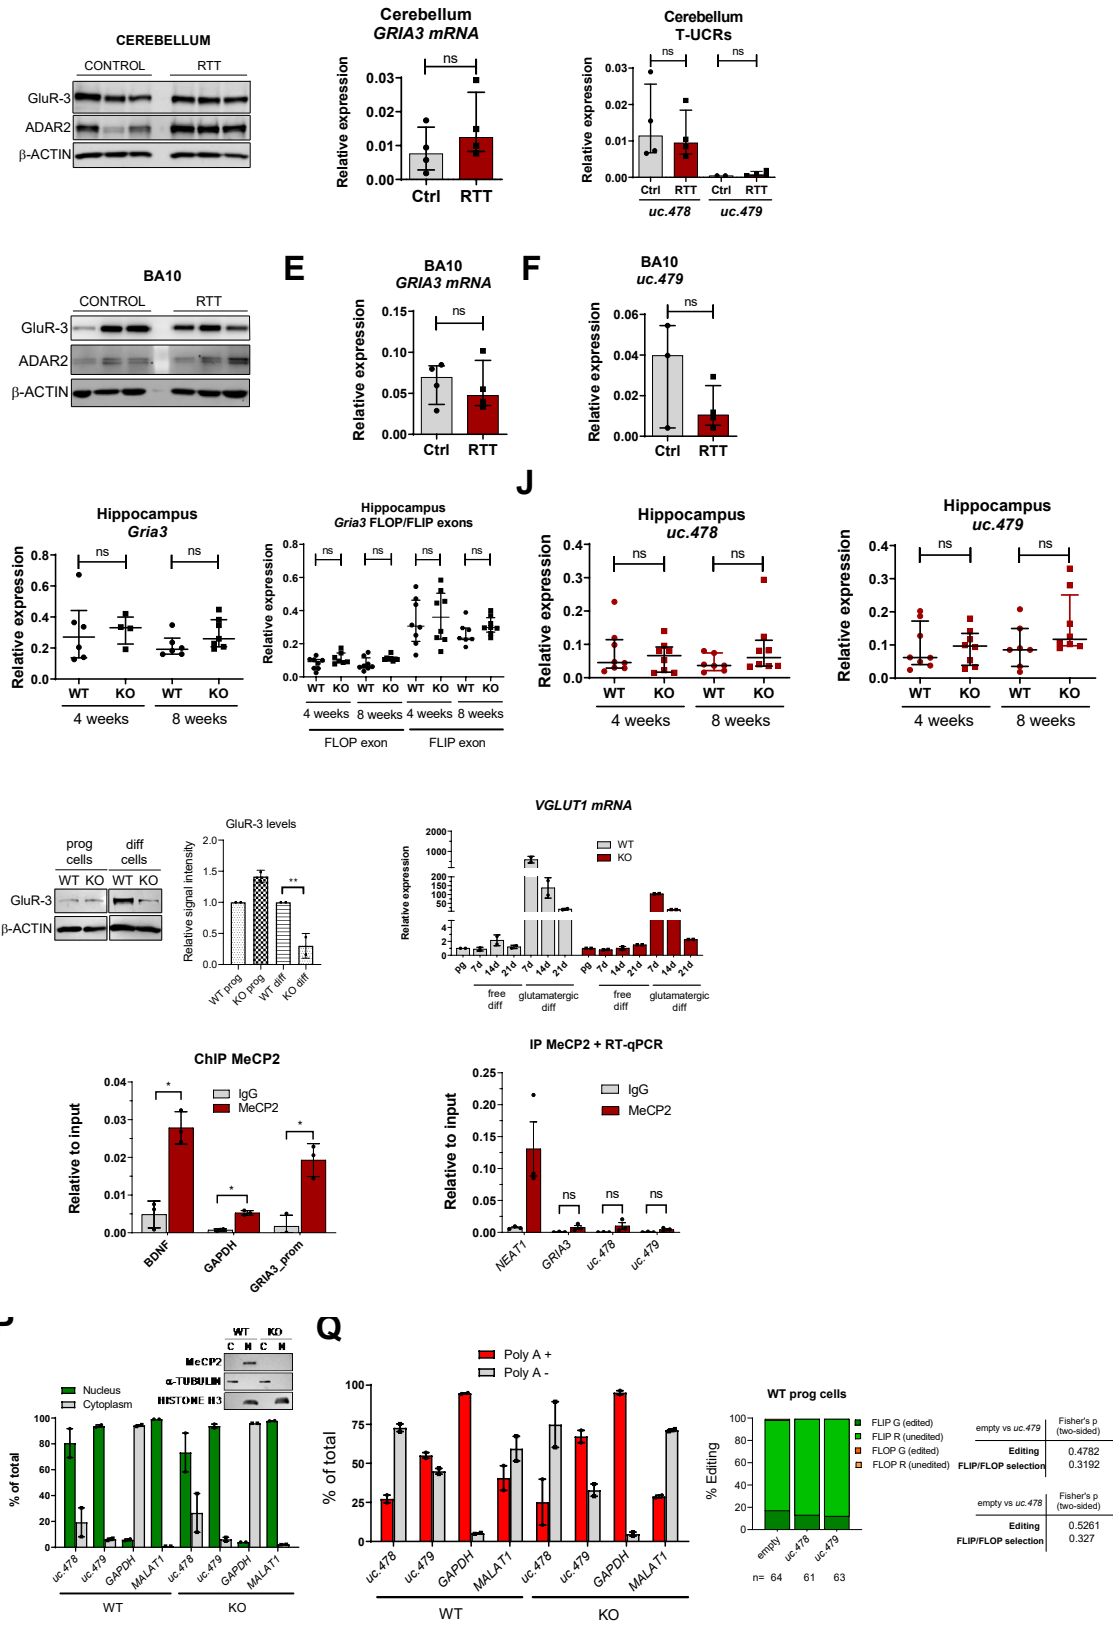

**Figure S5. Related to Figure 5. Analysis of *GRIA3* locus expression. (A)** Western blot analysis of GluR-3 and ADAR2 in the cerebellum of three post-mortem RTT patients and three healthy control's samples. **(B)** and **(C)** Expression levels of *GRIA3* mRNA and the T-UCRs *uc.478* and



*uc.479* were analyzed in the same samples as in (A) by RT-qPCR. Graphs represent the median with interquartile range of the data from the three subjects per group (two-tailed Mann–Whitney U test, ns = not significant). (D) Western blot analysis of GluR-3 and ADAR2 in the Brodmann area 10 (BA10) of three post-mortem RTT patients and three healthy control samples. (E) and (F) Expression levels of *GRIA3* mRNA and the T-UCRs *uc.478* and *uc.479* were analyzed in the same samples as in (D) by RT-qPCR. Graphs represent the median with interquartile range of the data from the three subjects per group (two-tailed Mann–Whitney U test, ns = not significant,). (G) Methylation analysis of DNA from post-mortem control or RTT hippocampus. The regions surrounding the alternative exons flop and flip on the *GRIA3* gene (including location of T-UCRs) are depicted, and all CpGs are marked with an asterisk. Graphs represent the average percentage of methylation of three replicates  $\pm$  SD for each position. For each replicate, at least 20 clones were sequenced. (H)-(K) Expression levels of *Gria3*, alternatively spliced exons flip and flop, *uc.478* and *uc.479*, were analyzed by RT-qPCR in the hippocampus of WT, or *Mecp2*-KO pre-symptomatic (4-week-old) and symptomatic (8-week-old) mice. Graphs show the median and interquartile range of six to eight replicates from different animals per condition (two-tailed Mann–Whitney U test, ns = not significant). (L) Western blot analysis of GluR-3 in WT or KO cells (progenitor (prog) or upon glutamatergic differentiation (diff)). The graphs on the right represent quantitation of band intensity of two representative experiments (one-way ANOVA test was used, \*\*  $p < 0.01$ ). (M) Expression levels of *VGLUT1* (marker of glutamatergic differentiation) were analyzed by RT-qPCR along the time-course of differentiation. (N) Chromatin immunoprecipitation (ChIP) coupled to qPCR to determine MeCP2 binding to *GRIA3* promoter in WT progenitor cells. The graph represents the mean  $\pm$  SD of three independent experiments. The enrichments corresponding to *BDNF* and *GAPDH* promoters are shown for comparison. Two-tailed Mann-Whitney U test were used (\*  $p < 0.05$ , ns = not significant). (O) RT-qPCR analysis of retrieved RNA following MeCP2 immunoprecipitation in WT progenitor cells. *GRIA3* locus-derived transcripts were analyzed. *NEATI* was used as positive control. Graph represents the mean  $\pm$  SEM of at least 3 independent experiments. Two-tailed Mann-Whitney U test was used (ns = not significant). (P) Nuclear/cytoplasmic fractionation of WT or KO neural progenitor cells were analyzed by RT-qPCR and western blot to assess fraction purity. *GAPDH* and *MALAT-1* are used as references of cytoplasmic and nuclear RNAs, respectively. (Q) Poly(A)<sup>+</sup>/poly(A)<sup>-</sup> partition of total RNA from WT and KO neural progenitor cells and analysis by RT-qPCR. *GAPDH* and *MALAT1* are used as references of poly(A)<sup>+</sup> and poly(A)<sup>-</sup> RNAs, respectively. Graphs represent the means  $\pm$ SD of 2 replicates of poly(A) selection. (R) Analysis of editing and alternative splicing choice of *GRIA3* mRNA in WT neural progenitor cells overexpressed with *uc.478* or *uc.479*. Percentages correspond to pooled data from sequences of at least two replicates per condition. The contingency graph displays flip/flop selection and the associated edited/unedited status. Fisher's exact test (two-tailed) was used to estimate the statistical significance of the editing and alternative splicing analyses.

**Table S1.** Oligos used in this work.

| Name                 | Sequence 5' - 3'                         | Experiment                 | Species |
|----------------------|------------------------------------------|----------------------------|---------|
| Mecp2 exon1 Fw       | CAATTGACGGCATCGCCGCTGAGA                 | <i>MeCP2</i><br>genotyping | Human   |
| Mecp2 exon1 Rv       | CATCCGCCAGCCGTGTCGTCCGAC                 | <i>MeCP2</i><br>genotyping | Human   |
| Mecp2 exon2 Fw       | CACTGTGTGTTACGTGCCAGT                    | <i>MeCP2</i><br>genotyping | Human   |
| Mecp2 exon2 Rv       | GGCACAGTTTGGCACAGTTAT                    | <i>MeCP2</i><br>genotyping | Human   |
| Mecp2 exon3 Fw       | TCTCTGTTGTCCTGGGGAAG                     | <i>MeCP2</i><br>genotyping | Human   |
| Mecp2 exon3 Rv       | CCCTGGGCACATACATTTTC                     | <i>MeCP2</i><br>genotyping | Human   |
| Mecp2 exon4a Fw      | GGCAGTGTGACTCTCGTTCA                     | <i>MeCP2</i><br>genotyping | Human   |
| Mecp2 exon4a Rv      | AGTCCTTTCCCGCTCTTCTC                     | <i>MeCP2</i><br>genotyping | Human   |
| Mecp2 exon4b Fw      | GAGACCGTACTCCCATCAA                      | <i>MeCP2</i><br>genotyping | Human   |
| Mecp2 exon4b Rv      | CCAATACTCCCACCCTGAA                      | <i>MeCP2</i><br>genotyping | Human   |
| sgRNA MECP2_1 Fw     | CACCGGATTTTGACTTCACGGTAAC                | CRISPR<br>sgRNA            | Mouse   |
| sgRNA MECP2_1 Rv     | AAACGTTACCGTGAAGTCAAAATCC                | CRISPR<br>sgRNA            | Mouse   |
| sgRNA MECP2_2 Fw     | CACCGGGCGCTCCATTATCCGTGAC                | CRISPR<br>sgRNA            | Mouse   |
| sgRNA MECP2_2 Rv     | AAACGTCACGGATAATGGAGCGCCC                | CRISPR<br>sgRNA            | Mouse   |
| BsGria3 Flop_reg1 Fw | TGGTGTTTTTGTTATTTTTTTTT                  | Methylation<br>analysis    | Human   |
| BsGria3 Flop_reg1 Rv | TTTATCCAAAAACCTTACTCA                    | Methylation<br>analysis    | Human   |
| BsGria3 Flop_reg2 Fw | TAAGGTTTTTTGGATAAATTGA                   | Methylation<br>analysis    | Human   |
| BsGria3 Flop_reg2 Rv | AAAAATAACCTAATCATTCCACTT                 | Methylation<br>analysis    | Human   |
| BsGria3 Flip_reg0 Fw | ATTTGTTTTTTGTTTGGAAAGTA                  | Methylation<br>analysis    | Human   |
| BsGria3 Flip_reg0 Rv | AAACCCTAACCACAAAATAATT                   | Methylation<br>analysis    | Human   |
| BsGria3 Flip_reg1 Fw | AAGGTAATGTTTAGGTTGTTTGTA                 | Methylation<br>analysis    | Human   |
| BsGria3 Flip_reg1 Rv | CTAAAATACCTTATTCATAAATTC<br>A            | Methylation<br>analysis    | Human   |
| BsGria3 Flip_reg2 Fw | ATAAGTTGAAAAATAAATGGTGG                  | Methylation<br>analysis    | Human   |
| BsGria3 Flip_reg2 Rv | AACCAAATTAATTTTCTAATCA                   | Methylation<br>analysis    | Human   |
| uc.478-BamHI Fw      | CTGGGATCCTTTTTATAACGTTAACG<br>ATTCC      | Cloning                    | Human   |
| uc.478-EcoRI Rv      | tttttttGAATTCTAATAAGATAACAGTC<br>TTGCC   | Cloning                    | Human   |
| uc.479-BamHI Fw      | CTGGGATCCTTAACTTTTTATAAGGT<br>AATGCTCAGG | Cloning                    | Human   |

|                                |                                                                                                |         |                    |
|--------------------------------|------------------------------------------------------------------------------------------------|---------|--------------------|
| uc.479-EcoRI Rv                | ttttttGAATTCACAAAAAGACCTTCA<br>GCGA                                                            | Cloning | Human              |
| hsa_circ_0050945-<br>BstEII Fw | TCGATTGGTAACCCTCCTCACCCCTC<br>TTCCCTCCATCTCTCCCTCTAGAAcata<br>gataccctggagcg                   | Cloning | Human              |
| hsa_circ_0050945-SacII<br>Rv   | TCGATTCCGCGGGGCTCAGGACAGG<br>CTGGGGTTGCTCAGCTCCTCACcttcca<br>tccaaggagctc                      | Cloning | Human              |
| hsa_circ_0050946-SacII<br>Rv   | TCGATTCCGCGGCCTGTGACGACGG<br>GGGCTTGAAGAAGGGCTTTACctggc<br>cagctttctccttg                      | Cloning | Human              |
| hsa_circ_0050948-SacII<br>Rv   | TCGATTCCGCGGCTTGCTGATGAGG<br>GAGGCAAAGGGCTGCACctgcaaggaggt<br>accatg                           | Cloning | Human              |
| hsa_circ_0050951-<br>BstEII Fw | TCGATTGGTAACCCGGTGTTCATATG<br>GTGCATAAGTTCTCTCTCCAGGtgc<br>cagagtcactgtttg                     | Cloning | Human              |
| hsa_circ_0050951-SacII<br>Rv   | TCGATTCCGCGGCCCATCCTCCTCCC<br>AGGATGCTCGCATCCGCCTACctgctg<br>tagcagcgagg                       | Cloning | Human              |
| hMeCP2-ex4 Fw                  | GTGTATTTGATCAATCCCCAGGGAA<br>AAGCCTTTCGCTCTAAAGTGGAG                                           | Cloning | Human              |
| hMeCP2-ex3 Rv                  | CTTTCCCTGGGATTGATCAAATA<br>CACATCATACTTCCCAGCAGAGCGG<br>C                                      | Cloning | Human              |
| hMeCP2e1-Fus-EcoRI<br>Fw       | ttttttGAATTCGCCGCCACCATGGCTG<br>CTGCTGCTGCTGCTGCTCCTTCTGGA<br>GGAGGAGGAGGAGGAGAAGAAGAA<br>AGAC | Cloning | Human              |
| hMeCP2e1-Fus Fw                | GGAGGAGGAGAAGAAGAAAGACTG<br>GAAGAAAAGTCAGAAGACCAGGAC<br>CTC                                    | Cloning | Human              |
| mmu_circ_41253-<br>EcoRV Fw    | TCGATTGATATCaaccttagcatgtccatcaa<br>tcctctgttcagGccgcaaggtcatctgtttg                           | Cloning | Mouse              |
| mmu_circ_41253-BstEII<br>Rv    | TCGATTGGTAACCTACCCATGGTCA<br>CACCTGCCCCTGGCCCCGCCTACctge<br>gtgtagcagcgagc                     | Cloning | Mouse              |
| mMeCP2-EcoRI Fw                | ttttttGAATTCGCCGCCACCATGGCCG<br>CCGCTGCCGCCACCCGCCG                                            | Cloning | Mouse              |
| hMeCP2-BamHI Rv                | ttttttGGATCCTCAGTAACTCTCTCG<br>GTCACGGGCGTCCGGCTGTC                                            | Cloning | Mouse and<br>Human |
| GRIA1 Fw                       | AGGTGCCAATTTCCCAACA                                                                            | RT-qPCR | Human              |
| GRIA1 Rv                       | AGCAGCATGTTCTGTGACT                                                                            | RT-qPCR | Human              |
| GRIA2 Fw                       | TTCAGATGAGACCCGACCTC                                                                           | RT-qPCR | Human              |
| GRIA2 Rv                       | GCACAGCTTGCAAGTGTGAT                                                                           | RT-qPCR | Human              |
| GRIA3 Fw                       | TCACTACATGCTCGTAACT                                                                            | RT-qPCR | Human              |
| GRIA3 Rv                       | CCATGCATGACTCTTCCAG                                                                            | RT-qPCR | Human              |
| SIRT2 Fw                       | TTGCTGAGCTCCTTGGATGG                                                                           | RT-qPCR | Human              |
| SIRT2 Rv                       | CTCGTCTTGGCAGGTGGCG                                                                            | RT-qPCR | Human              |
| hsa_circ_0050945 Fw            | TGGATGGAAGAACATAGATACCC                                                                        | RT-qPCR | Human              |
| hsa_circ_0050945 Rv            | GCTGACGCAGTGTGATGTGT                                                                           | RT-qPCR | Human              |
| hsa_circ_0050946 Fw            | GCTGGCCAGAACATAGATACC                                                                          | RT-qPCR | Human              |
| hsa_circ_0050946 Rv            | GCTGACGCAGTGTGATGTGT                                                                           | RT-qPCR | Human              |
| hsa_circ_0050948 Fw            | CTCCTTGAGAACATAGATACC                                                                          | RT-qPCR | Human              |
| hsa_circ_0050948 Rv            | GCTGACGCAGTGTGATGTGT                                                                           | RT-qPCR | Human              |
| hsa_circ_0050951 Fw            | CTACACGCAGGTCGCAGA                                                                             | RT-qPCR | Human              |
| hsa_circ_0050951 Rv            | GTCATAGAGGCCGGTGGATG                                                                           | RT-qPCR | Human              |
| vGlut1 Fw                      | CAGCCAACAGAGTTTTCGGC                                                                           | RT-qPCR | Human              |
| vGlut1 Rv                      | CGACTCCGTTCTAAGGGTGG                                                                           | RT-qPCR | Human              |

|               |                         |         |                 |
|---------------|-------------------------|---------|-----------------|
| vGlut2 Fw     | TTGTGGTGGTTTTGGCATGG    | RT-qPCR | Human           |
| vGlut2 Rv     | ACTGGCATATCTTGAGCGA     | RT-qPCR | Human           |
| L13 Fw        | CGGACCGTGCGAGGTAT       | RT-qPCR | Human           |
| L13 Rv        | CACCATCCGCTTTTTCTTGTC   | RT-qPCR | Human           |
| B2m Fw        | CATGGCTCGCTCGGTGACC     | RT-qPCR | Mouse           |
| B2m Rv        | AATGTGAGGCGGGTGGAACTG   | RT-qPCR | Mouse           |
| SIRT2 Fw      | GCACTGGGCCCTCTTAACAT    | RT-qPCR | Mouse           |
| SIRT2 Rv      | CTGGGATTGAGTTGGGGACC    | RT-qPCR | Mouse           |
| circSirt2 Fw  | CCAACCATCTGCCACTACTTC   | RT-qPCR | Mouse           |
| circSirt2 Rv  | CCCACCAAACAGATGACCTT    | RT-qPCR | Mouse           |
| Map1a Fw      | TAGAACCCGAGGGAGACCTT    | RT-qPCR | Mouse           |
| Map1a Rv      | GCAGGAAACAGTGAGGAAGG    | RT-qPCR | Mouse           |
| circMap1a Fw  | TATCAAACTTCGCCCAGGT     | RT-qPCR | Mouse           |
| circMap1a Rv  | ATGGTGAACCTCTGAGCTGA    | RT-qPCR | Mouse           |
| Dnah2 Fw      | CTTGCGGACCTGCACTCCTA    | RT-qPCR | Mouse           |
| Dnah2 Rv      | GAGTCTCCAGGTTGGGTAGGT   | RT-qPCR | Mouse           |
| circDnah2 Fw  | CTCATCTCAGACCTGCGGAATC  | RT-qPCR | Mouse           |
| circDnah2 Rv  | CGCATTGTTAGTCATGCCAC    | RT-qPCR | Mouse           |
| Foxp1 Fw      | CAGTCTTGTGGCGTTCTGC     | RT-qPCR | Mouse           |
| Foxp1 Rv      | CGTCTACCCCTGAGCTTTTA    | RT-qPCR | Mouse           |
| circFoxp1 Fw  | GTGAGACGTGACCTTTGGAG    | RT-qPCR | Mouse           |
| circFoxp1 Rv  | GCCATAAAAAGCCTGGGGTC    | RT-qPCR | Mouse           |
| Birc6 Fw      | CAGGATGGGACGTGGAACAA    | RT-qPCR | Mouse           |
| Birc6 Rv      | CCCATTGACAGCACTCA       | RT-qPCR | Mouse           |
| circBirc6 Fw  | TTCTGGAGCTCCTCAGTCAGT   | RT-qPCR | Mouse           |
| circBirc6 Rv  | CCTGCGGCGGAGTCGTT       | RT-qPCR | Mouse           |
| Gria4 Fw      | AAAAGCACAGGACCTCGAAA    | RT-qPCR | Mouse           |
| Gria4 Rv      | TGCTGTGTCATTGCCAAGAG    | RT-qPCR | Mouse           |
| circGria4 Fw  | TTCAAGGACTGACTGGGAATG   | RT-qPCR | Mouse           |
| circGria4 Rv  | GTAGCCTTTGACGTGCTTCC    | RT-qPCR | Mouse           |
| Gria2 Fw      | CCATCGAAAGTGCTGAGGAT    | RT-qPCR | Mouse           |
| Gria2 Rv      | AGGGCTCTGCACTCCTCATA    | RT-qPCR | Mouse           |
| circGria2 Fw  | CCATCGAAAGTGCTGAGGAT    | RT-qPCR | Mouse           |
| circGria2 Rv  | CTCCTGCATTTCTCTCTCTG    | RT-qPCR | Mouse           |
| Btrc Fw       | CCAGGCTTTGCATAAACCAA    | RT-qPCR | Mouse           |
| Btrc Rv       | CACAATCATGCTGGAAGTGC    | RT-qPCR | Mouse           |
| Hnrmp1 Fw     | CGGCTTAGAGGACTCCCTTT    | RT-qPCR | Mouse           |
| Hnrmp1 Rv     | TATCCCATTTGGCACGATTT    | RT-qPCR | Mouse           |
| Zeb2 Fw       | CCAATCCCAGGAGGAAAAAC    | RT-qPCR | Mouse           |
| Zeb2 Rv       | GAGGGTTTGCAAGGCTATCA    | RT-qPCR | Mouse           |
| Gli3 Fw       | CCTTCCATCCTCCTGTACCA    | RT-qPCR | Mouse           |
| Gli3 Rv       | TCTGGATACGTGGGCTACT     | RT-qPCR | Mouse           |
| Meis2 Fw      | GATGACGACGATCCAGACAA    | RT-qPCR | Mouse           |
| Meis2 Rv      | TCTGAAGGGTACGGGTGTGT    | RT-qPCR | Mouse           |
| S100b Fw      | GGTGACAAGCACAAAGCTGAA   | RT-qPCR | Mouse           |
| S100b Rv      | GTCCAGCGTCTCCATCACTT    | RT-qPCR | Mouse           |
| Gria3 flop Fw | AGCAGAGAAAGCCGTGTGAT    | RT-qPCR | Mouse           |
| Gria3 flop Rv | AAGAGGCCTTGCTCATTGAG    | RT-qPCR | Mouse           |
| Gria3 flip Fw | AGCAGAGAAAGCCGTGTGAT    | RT-qPCR | Mouse           |
| Gria3 flip Rv | GAGTCCTTGGCTCCACATTC    | RT-qPCR | Mouse           |
| uc.75 Fw      | AAATTGAAAAATCCCATCTCACA | RT-qPCR | Mouse and Human |
| uc.75 Rv      | TCATTTGGGCAAATTTTACG    | RT-qPCR | Mouse and Human |
| uc.77 Fw      | CTGTCACTGCTCCCAAGA      | RT-qPCR | Mouse and Human |
| uc.77 Rv      | TCAGCCAAAGATGCTTGAAA    | RT-qPCR | Mouse and Human |

|              |                          |                               |                 |
|--------------|--------------------------|-------------------------------|-----------------|
| uc.78 Fw     | TTGAAGGTGGCTGTTTCTGA     | RT-qPCR                       | Mouse and Human |
| uc.78 Rv     | GAGCTAATGCCCCGTGTTTA     | RT-qPCR                       | Mouse and Human |
| uc.186 Fw    | TATCCCATTTGGCACGATTT     | RT-qPCR                       | Mouse and Human |
| uc.186 Rv    | TCATTTCTGGGCTTGTGATG     | RT-qPCR                       | Mouse and Human |
| uc.220 Fw    | AATTGCCTCCTCCAGAAAGT     | RT-qPCR                       | Mouse and Human |
| uc.220 Rv    | CCCAAGTAAAAGTGCCTTCG     | RT-qPCR                       | Mouse and Human |
| uc.221 Fw    | CCCCAGGATCAATTCTGAAC     | RT-qPCR                       | Mouse and Human |
| uc.221 Rv    | CAGCGGGCTACATGAAAAAT     | RT-qPCR                       | Mouse and Human |
| uc.309 Fw    | GCTCATTTCTGGCAGGTTTT     | RT-qPCR                       | Mouse and Human |
| uc.309 Rv    | GAACTTGATCGATGGCTGCT     | RT-qPCR                       | Mouse and Human |
| uc.478 Fw    | AAGCATTTGTGCATTTTCTTACAA | RT-qPCR                       | Mouse and Human |
| uc.478 Rv    | AAGAGGCCTTGCTCATTCAG     | RT-qPCR                       | Mouse and Human |
| uc.479 Fw    | CCCCTGCTTTATCGCTTCT      | RT-qPCR                       | Mouse and Human |
| uc.479 Rv    | CGTTCTTCACGTGGGAAATAA    | RT-qPCR                       | Mouse and Human |
| GRIA3 Fw     | GGATTCCAAAGGCTATGGTG     | Editing and splicing analysis | Human           |
| GRIA3 Rv     | ATAGAAAACGCCTGCCACAT     | Editing and splicing analysis | Human           |
| Gria3 Fw     | AGCAGAGAAAGCCGTGTGAT     | Editing and splicing analysis | Mouse           |
| Gria3 Rv     | CTGCCCCGTGATTTGTAACAG    | Editing and splicing analysis | Mouse           |
| GAPDH Fw     | TCTTCTTTTGCCTGCCAG       | RT-qPCR N/C fractioning       | Human           |
| GAPDH Rv     | AGCCCCAGCCTTCTCCA        | RT-qPCR N/C fractioning       | Human           |
| MALAT1 Fw    | AAGGTCAAGAGAAGTGTGAGC    | RT-qPCR N/C fractioning       | Human           |
| MALAT1 Rv    | AATGTTAAGAGAAGCCCAGGG    | RT-qPCR N/C fractioning       | Human           |
| GAPDH Fw     | AGGTGAAGGTCGGAGTCAA      | ChIP                          | Human           |
| GAPDH Rv     | CCCATACGACTGCAAAGACC     | ChIP                          | Human           |
| BDNF Fw      | CTGGTAATTCGTGCTAGAGT     | ChIP                          | Human           |
| BDNF Rv      | CACGAGAGGGCTCCACGGT      | ChIP                          | Human           |
| SIRT2prom Fw | CCCCAGTTAGGTAAGAAAGCG    | ChIP                          | Human           |
| SIRT2prom Rv | CCAATCAGAGTATTCGGGAGG    | ChIP                          | Human           |
| GRIA3prom Fw | GAAAGGAAGAGTGAGCGAGAG    | ChIP                          | Human           |
| GRIA3prom Rv | GCCTAAAACGAAGCTGACAAG    | ChIP                          | Human           |
| NEAT1 Fw     | TTCCTCCTTCCACACAGACC     | IP RT-qPCR                    | Human           |

|              |                       |            |       |
|--------------|-----------------------|------------|-------|
| NEAT1 Rv     | GAAGGAAGCTTGGCAAGGAG  | IP RT-qPCR | Human |
| circSCMH1 Fw | CCACCTCTTGGATTTCCGGCT | IP RT-qPCR | Human |
| circSCMH1 Rv | AGTGACAAGCACCTCTGAGC  | IP RT-qPCR | Human |
